# Supplementary material
Source: PubMed Central journal article supplement (PMC3160023)
Supplement: supp_tpc.111.086454_van_Wijk_Supplemental_Data_final.pdf [file supp_tpc.111.086454_van_Wijk_Supplemental_Data_final.pdf]

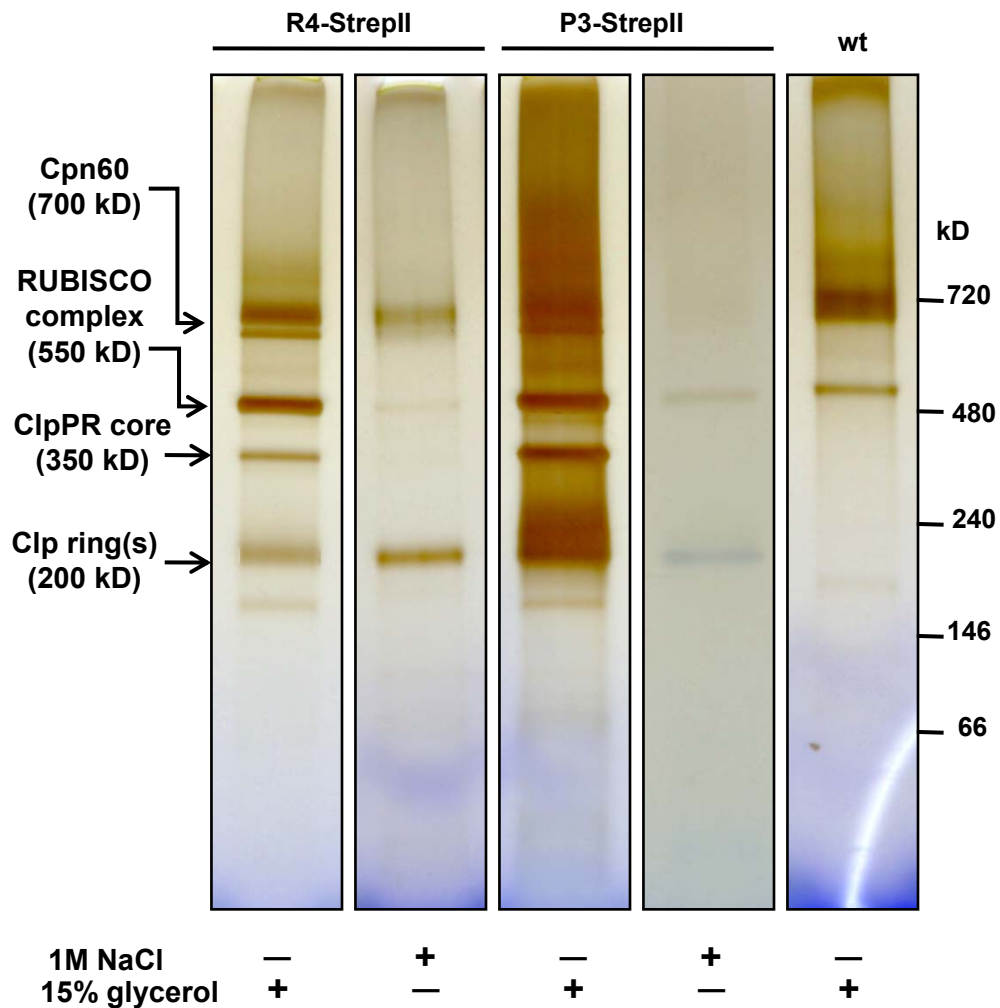

**Supplemental Figure 1.** Affinity purification and MS-based protein component identification of StrepII-tagged Clp assemblies. Native PAGE analysis of affinity-purified StrepII-tagged Clp assemblies (350 and 200kDa) from total leaf extractions showing the gel lanes at full-length. On-column salt incubation dissociated the individual rings from the core revealing the Strep-tagged Clp ring. Additional bands at 720 and 500 kDa were observed but were also found in mock purifications (with wild-type). MS/MS analyses of these bands indicate the co-purification of the Chaperone 60 complex (700 kDa) and the highly abundant Ribulose-1,5-bisphosphate carboxylase oxygenase (RUBISCO) complex (~550 kDa)

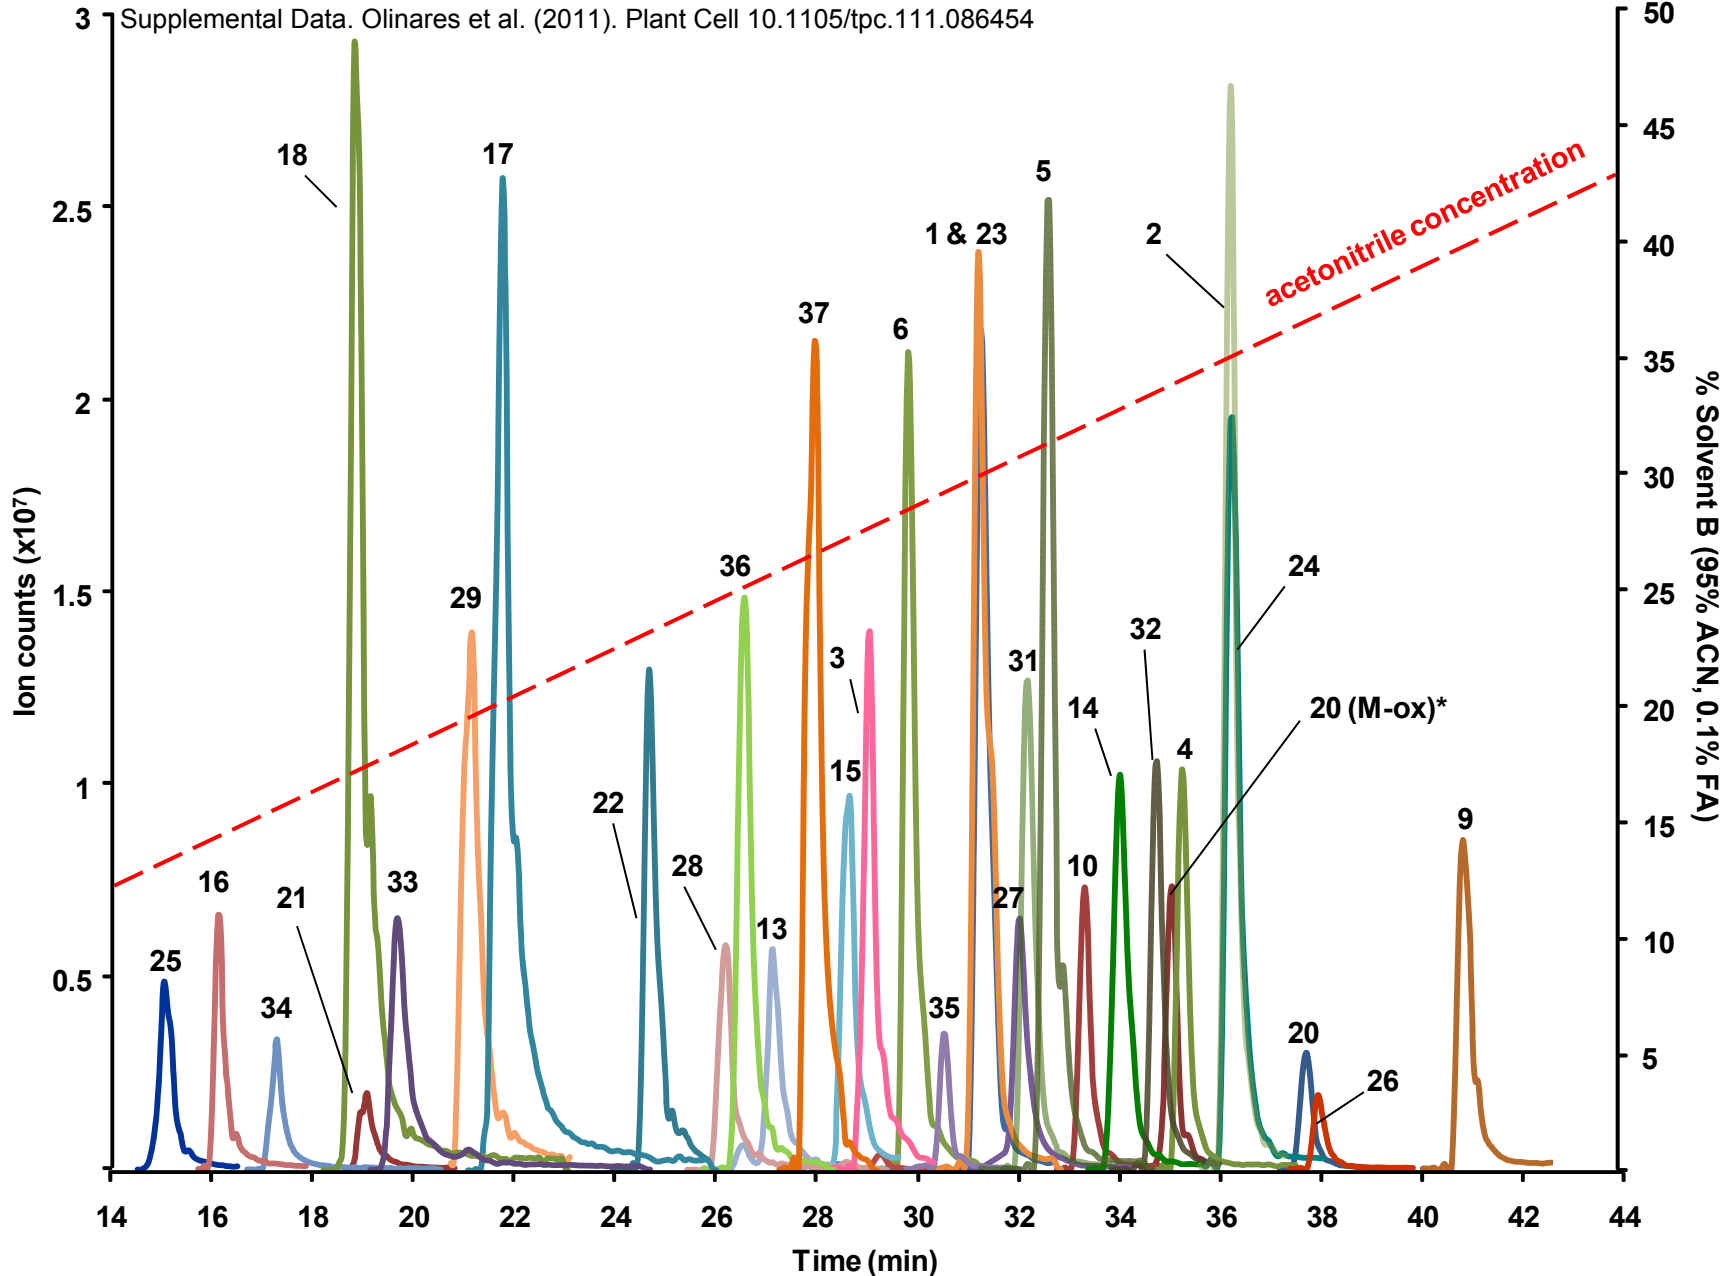

**Supplemental Fig. 2** *Legend on next page*

**Supplemental Figure 2.** Representative extracted ion chromatograms (XICs) of the peptides derived from 100 fmol Clp-QconCAT protein. The numbers designate the position and identity of the peptide (see Supplemental Table 2). 32 out of the 37 Clp-QconCAT peptides can be detected and quantified. All the quantifiable Clp-QconCAT peptides eluted within the first 45 minutes of the run. The % acetonitrile concentration (red dashed line) was estimated based on the mobile phase gradient used with correction for dead volume during the chromatographic run.



**Supplemental Figure 3.** Phylogenetic analysis of the ClpP/R proteins from proteobacteria, photosynthetic bacteria, green algae and plants. The phylogenetic tree inferred for the 118 Clp sequences from various prokaryotes and photosynthetic eukaryotes employing the Maximum Likelihood (ML) approach (Felsenstein, 1981) with the General Time Reversible (GTR) model for nucleotide substitution (Tavar, 1986) and a gamma model of substitution rate heterogeneity (Yang, 1996). Support values are shown from 1,000 non-parametric bootstrap inferences. This includes the *Escherichia coli* ClpP; the ClpP from alphaproteobacteria presumed to be the ancestor of mitochondrial organelles: *Rickettsia prowazekii* (Rp) and *Wolbachia wmel* (Ww); the cyanobacteria which are the ancestor of plastids: *Anabaena sp. (strain PCC 7120)* (As), *Synechocystis sp. (strain PCC 6803)* (Ss), *Synechococcus elongatus* (strain PCC 7942) (Se), *Microcystis aeruginosa* (Ma) and *Prochlorococcus marinus* MED4 (Pm); the green alga *Chlamydomonas reinhardtii* (Cr) and representative plant species: the bryophyte *Physcomitrella patens* (Pp), the lycopod *Selaginella moellendorffii* (Sm), the dicots *Arabidopsis thaliana* (At) and *Populus trichocarpa* (Pt) as well as dicots *Zea mays* (Zm) and *Oryza sativa* (Os). The plastid ClpP1 homologues for the ferns *Psilotum nodum* (Pn) and *Adiantum capillus renesis* (Ac) and the gymnosperm *Pinus thunbergii* (Pnt) were also collected from recent chloroplast genome sequencing projects for these species. The Cr\_P1\* is the plastid-encoded ClpP1 in green alga with the large insertion (IS1) sequence removed. Ec\_P was used as the outgroup.

**Felsenstein, J.** (1981). Evolutionary trees from DNA sequences: a maximum likelihood approach. *J Mol Evol* **17**: 368-376.

**Tavar, S.** (1986). Some probabilistic and statistical problems on the analysis of DNA sequences. In *Some mathematical questions in biology-DNA sequence analysis.*, R.M. Miura, ed (Providence, R.I.), pp. 57-86.

**Yang, Z.** (1996). Among-site rate variation and its impact on phylogenetic analyses. *Trends Ecol. Evol.* **11**: 367-372.

Supplemental Figure 4. Protein sequence alignment:

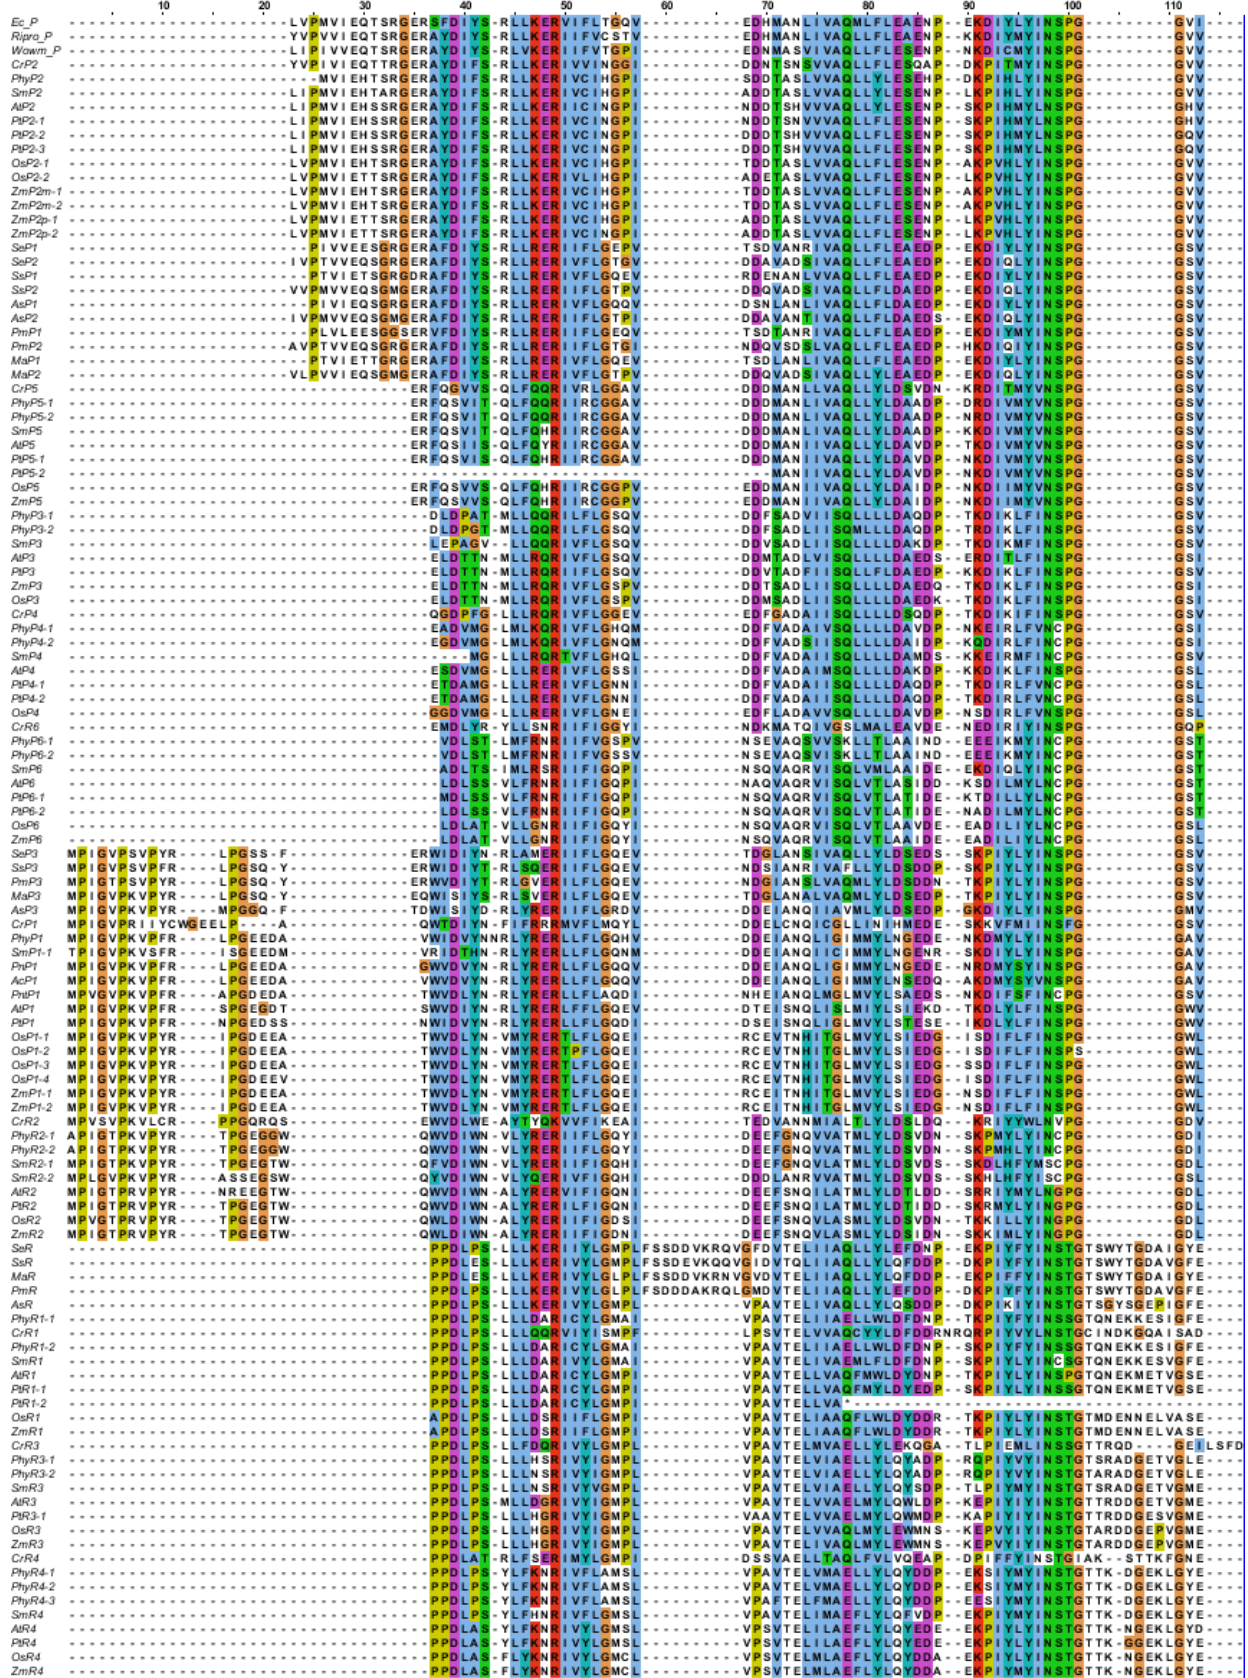















**Supplemental Table 1. MS/MS analyses of the affinity-purified Clp assemblies<sup>a</sup>**

| Accession   | Clp | R4-StrepII           |                      |                      | P3-StrepII           |                                   |                                   |                   |
|-------------|-----|----------------------|----------------------|----------------------|----------------------|-----------------------------------|-----------------------------------|-------------------|
|             |     | no salt              |                      | + salt               | no salt              |                                   | + salt                            |                   |
|             |     | core<br>(350<br>kDa) | ring(s)<br>(200 kDa) | ring<br>(200<br>kDa) | core<br>(350<br>kDa) | ring(s)<br>(200 kDa) <sup>b</sup> | ring(s)<br>(180 kDa) <sup>b</sup> | ring (200<br>kDa) |
| ATCG00670.1 | P1  | 5                    | 2                    | 6                    | 43                   | 11                                | 40                                |                   |
| AT1G49970.1 | R1  | 8                    | 1                    | 19                   | 19                   | 10                                | 28                                |                   |
| AT1G12410.1 | R2  | 6                    | 4                    | 30                   | 25                   | 20                                | 60                                |                   |
| AT1G09130.1 | R3  | 11                   | 2                    | 33                   | 35                   | 34                                | 39                                |                   |
| AT4G17040.1 | R4  | 10                   | 4                    | 43                   | 57                   | 26                                | 77                                |                   |
| AT1G66670.1 | P3  | 3                    | 1                    |                      | 35                   | 50                                | 70                                | 18                |
| AT5G45390.1 | P4  | 9                    | 6                    | 3*                   |                      | 122                               | 127                               | 72                |
| AT1G02560.1 | P5  | 8                    | 4                    | 2*                   | 66                   | 86                                | 109                               | 41                |
| AT1G11750.1 | P6  | 10                   | 6                    |                      | 43                   | 86                                | 76                                | 40                |
| AT4G25370.1 | T1  | 2                    |                      |                      | 38                   | 36                                | 26                                |                   |
| AT4G12060.1 | T2  | 3                    |                      |                      | 6                    | 2                                 |                                   |                   |

<sup>a</sup> MS/MS analyses was performed from peptides extracted from the in-gel trypsin-digested protein bands from native gel separations of the affinity-purified Clp complexes (see Fig.1 for the corresponding gel images). Shown here are the total adjusted spectral counts per protein.

<sup>b</sup> Two bands were observed at slightly different masses and were excised separately for in-gel digestion and MS/MS analysis. Nevertheless, both bands contained all the ClpP/R subunits.

\* These are spectral counts from minor contaminating hydrophobic peptides of ClpP4 and ClpP5 that could not be fully removed from the column ("sticky peptides") even after two blank LC-MS runs.

Supplemental Table 2. The peptides comprising Clp-QconCAT and their corresponding properties.

| Accession                               | Peptide   | Position <sup>a</sup> | Peptide                  | Residue order <sup>b</sup> | Charge states | Number of Residues | [M+2H] <sup>2+</sup>  | [M+3H] <sup>3+</sup> | Q? <sup>c</sup> |
|-----------------------------------------|-----------|-----------------------|--------------------------|----------------------------|---------------|--------------------|-----------------------|----------------------|-----------------|
| <b>Clp core subunits</b>                |           |                       |                          |                            |               |                    |                       |                      |                 |
| ATCG00670.1                             | P1-1      | 19                    | IAFPHAR                  | 245-251                    | 2,3           | 7                  | 406.2323,<br>271.1573 | 271.1573             | N               |
|                                         | P1-2      | 6                     | SPGEGDTSWVDIYNR          | 86-100                     | 2             | 15                 | 848.3841              |                      | Y               |
| AT1G49970.1                             | R1-1      | 11                    | YLQAQAIDYGIADK           | 143-157                    | 2             | 15                 | 820.4199              |                      | Y               |
|                                         | R1-2      | 24                    | TAPPDLPSLLLDAR           | 323-336                    | 2             | 14                 | 739.9143              |                      | Y               |
| AT1G12410.1                             | R2-1      | 25                    | IALQSPAGAAR              | 337-347                    | 2             | 11                 | 527.8038              |                      | Y               |
|                                         | R2-2      | 4                     | FNAEEAIEYGLIDK           | 56-69                      | 2             | 14                 | 806.3987              |                      | Y               |
| AT1G09130.1                             | R3-1      | 12                    | EPIYIYINSTGTTR           | 158-171                    | 2             | 14                 | 814.4199              |                      | N               |
|                                         | R3-2      | 26                    | DILVELLSK                | 348-356                    | 2             | 9                  | 515.3132              |                      | Y               |
| AT4G17040.1                             | R4-1      | 27                    | GSAHEQPPDLASYLFK         | 357-373                    | 2, 3          | 17                 | 928.9625              | 619.6441             | Y               |
|                                         | R4-2      | 14                    | YFSPTEAVEYGIIDK          | 181-195                    | 2             | 15                 | 866.4274              |                      | Y               |
| AT1G66670.1                             | P3-1      | 7                     | DNTNLPSEK                | 101-109                    | 2             | 9                  | 523.2491              |                      | N               |
|                                         | P3-2      | 20                    | LPSFEELDTTNMLLR          | 252-266                    | 2             | 15                 | 889.9533              |                      | Y               |
|                                         | P3-2 (ox) | 20                    | LPSFEELDTTNM(ox)LLR      | 252-266                    | 2             | 15                 | 897.9508              |                      | Y               |
| AT5G45390.1                             | P4-1      | 8                     | SFEQVLK                  | 110-116                    | 2             | 7                  | 425.7371              |                      | Y               |
|                                         | P4-2      | 21                    | ADVSTIALGIAASTASIILGAGTK | 267-290                    | 3             | 24                 | 1101.579              |                      | N               |
| AT1G02560.1                             | P5-1      | 22                    | ANLNGYLAYHTGQSLEK        | 291-307                    | 2, 3          | 17                 | 939.9709              | 626.983              | Y               |
|                                         | P5-2      | 9                     | FQSIISQLFQYR             | 117-128                    | 2             | 12                 | 765.4092              |                      | Y               |
| AT1G11750.1                             | P6-1      | 23                    | IIFIGQPINAQVAQR          | 308-322                    | 2             | 15                 | 834.4832              |                      | Y               |
|                                         | P6-2      | 10                    | VISQLVTLASIDDK           | 129-142                    | 2             | 14                 | 751.4272              |                      | Y               |
| <b>Clp chaperones/adaptors</b>          |           |                       |                          |                            |               |                    |                       |                      |                 |
| AT4G25370.1                             | T1-1      | 13                    | DETLSELLGK               | 172-180                    | 2             | 9                  | 488.2715              |                      | Y               |
|                                         | T1-2      | 28                    | AIAWAIDEK                | 374-382                    | 2             | 9                  | 508.7742              |                      | Y               |
| AT4G12060.1                             | T2-1      | 29                    | ALDSALDQNLK              | 383-393                    | 2             | 11                 | 594.317               |                      | Y               |
|                                         | T2-2      | 15                    | ILATLGFTDEK              | 196-206                    | 2             | 11                 | 604.3321              |                      | Y               |
| AT1G68660.1                             | S-1       | 30                    | VILHNDNFNK               | 394-403                    | 2, 3          | 10                 | 607.3198              | 405.2157             | N               |
|                                         | S-2       | 16                    | GGGVLDKPIIEK             | 207-218                    | 2, 3          | 12                 | 613.3612              | 409.2432             | Y               |
| AT5G50920.1                             | C1-1      | 31                    | VPEPTVDETIQILK           | 404-417                    | 2             | 14                 | 791.4403              |                      | Y               |
| AT5G50920.1,                            | C1/2-1    | 17                    | VLENLGADPSNIR            | 219-231                    | 2             | 13                 | 699.3728              |                      | Y               |
| AT3G48870.1                             | C1/2-2    | 32                    | GSGFVAVEIPFTPR           | 418-431                    | 2             | 14                 | 738.8959              |                      | Y               |
| AT5G51070.1                             | D1-1      | 18                    | VVGQDEAVAAISR            | 232-244                    | 2             | 13                 | 657.8542              |                      | Y               |
|                                         | D1-2      | 33                    | VFEAAVEYSR               | 432-441                    | 2             | 10                 | 585.7931              |                      | Y               |
| <b>Localization markers<sup>d</sup></b> |           |                       |                          |                            |               |                    |                       |                      |                 |
| AT1G04410.1                             | MD-1      | 1                     | VLVVANPANTNALILK         | 8-23                       | 2             | 16                 | 825.5011              |                      | Y               |
|                                         | MD-2      | 34                    | LSVPVSDVK                | 442-450                    | 2             | 9                  | 472.2766              |                      | Y               |
| AT5G20290.1                             | RPS8-1    | 3                     | VLDVVYNASNELVR           | 41-55                      | 2             | 15                 | 852.9494              |                      | Y               |
|                                         | RPS8-2    | 36                    | SAIVQVDAAPFK             | 465-476                    | 2             | 12                 | 623.3455              |                      | Y               |
| AT3G04790.1                             | PRI-2     | 35                    | SLGIPLVGLDTHPR           | 451-464                    | 2, 3          | 14                 | 737.9225              | 492.2841             | Y               |
|                                         | PRI-1     | 2                     | LLSSGELYDIVGIPTSK        | 24-40                      | 2             | 17                 | 896.4906              |                      | Y               |
| AT5G51820.1                             | PGM1-1    | 5                     | VAEIPDIDLSQVGVTK         | 70-85                      | 2             | 16                 | 842.4618              |                      | Y               |
|                                         | PGM1-2    | 37                    | IYGNTLSISEIK             | 477-488                    | 2             | 12                 | 669.3692              |                      | Y               |

<sup>a</sup> Order by which these proteotypic peptide appeared starting from the N-terminus of the Clp-QconCAT construct

<sup>b</sup> Residue numbers of the peptide sequence within the Clp-QconCAT construct.

<sup>c</sup> Can be detected and quantified. Y=yes, N = no.

<sup>d</sup>These proteins serve as reference for organellar location. Malate dehydrogenase (MD) and the 40S ribosomal subunit S8 (RPS8) are both cytosolic whereas ribose 5-phosphate isomerase (PRI) and phosphoglucosyltransferase (PGM) are both plastid-localized.

**Supplemental Table 3. Linear instrument response for individual Clp-QconCAT peptides.\***

| Peptide                        | Position | slope | y-intercept | Regression coefficient |
|--------------------------------|----------|-------|-------------|------------------------|
| <b>ClpP1/R ring</b>            |          |       |             |                        |
| P1-2                           | 6        | 1.40  | -0.05       | 0.995                  |
| R1-1                           | 11       | 1.09  | -0.04       | 0.971                  |
| R1-2                           | 24       | 1.20  | -0.04       | 0.990                  |
| R2-1                           | 25       | 1.05  | 0.14        | 0.999                  |
| R2-2                           | 4        | 1.12  | 0.04        | 0.987                  |
| R3-2                           | 26       | 0.76  | 0.13        | 0.968                  |
| R4-1                           | 27       | 1.13  | -0.06       | 0.996                  |
| R4-2                           | 14       | 1.32  | -0.05       | 0.991                  |
| <b>ClpP3-P6 ring</b>           |          |       |             |                        |
| P3-2                           | 20       | 0.89  | 0.26        | 0.987                  |
| P4-2                           | 8        | 1.04  | 0.05        | 0.999                  |
| P5-1                           | 22       | 1.827 | -0.07       | 0.999                  |
| P5-2                           | 9        | 0.57  | 0.42        | 0.956                  |
| P6-1                           | 23       | 1.21  | -0.05       | 0.994                  |
| P6-2                           | 10       | 1.22  | -0.33       | 0.975                  |
| <b>Clp chaperones/adaptors</b> |          |       |             |                        |
| T1-1                           | 13       | 1.05  | 0.04        | 0.998                  |
| T1-2                           | 28       | 1.10  | 0.07        | 0.998                  |
| T2-1                           | 29       | 1.00  | 0.08        | 0.998                  |
| T2-2                           | 15       | 0.72  | 0.19        | 0.987                  |
| S-2                            | 16       | 0.86  | 0.12        | 0.998                  |
| C1/2-1                         | 17       | 1.07  | 0.07        | 0.997                  |
| C1/2-2                         | 32       | 0.70  | 0.30        | 0.971                  |
| C1-1                           | 31       | 0.92  | 0.02        | 0.986                  |
| D1-1                           | 18       | 1.08  | 0.09        | 0.999                  |
| D1-2                           | 33       | 1.31  | 0.004       | 0.993                  |
| <b>Localization markers</b>    |          |       |             |                        |
| MD-1                           | 1        | 1.11  | -0.09       | 0.992                  |
| MD-2                           | 34       | 1.03  | 0.002       | 0.998                  |
| PGM1-1                         | 5        | 1.09  | -0.09       | 0.988                  |
| PGM1-2                         | 37       | 1.30  | -0.06       | 0.996                  |
| PRI-1                          | 2        | 0.87  | 0.13        | 0.981                  |
| PRI-2                          | 35       | 1.14  | 0.03        | 0.996                  |
| RPS8-1                         | 3        | 1.26  | -0.04       | 0.992                  |
| RPS8-2                         | 36       | 0.85  | 0.15        | 0.989                  |

\* For 100 fmol of heavy Clp-Qconcat peptides mixed with varying amounts of their light versions spanning two orders of magnitude (10 fmol to 1 pmol) with L/H ratios of 0.1, 0.2, 0.5, 1, 2, 5 and 10.

Supplemental Table 4. Quantification of Clp subunits and determination of subunit stoichiometry in the Clp core complex and constituent Clp rings.<sup>a</sup>

| Clp core complex (350 kDa) |     |                       |      |      |      |      |     |      |     |               |      |      |      |             |             |             |  |  |  |  |
|----------------------------|-----|-----------------------|------|------|------|------|-----|------|-----|---------------|------|------|------|-------------|-------------|-------------|--|--|--|--|
| Clp                        | Pep | Quantity (x 100 fmol) |      |      |      |      |     |      |     | Stoichiometry |      |      |      |             |             |             |  |  |  |  |
|                            |     | R4-1                  | %CV  | R4-2 | %CV  | P3-1 | %CV | P3-2 | %CV | R4-1          | R4-2 | P3-1 | P3-2 | AVE         | SD          | %CV         |  |  |  |  |
| P1                         | Q6  | 1.62                  | 1.2  | 0.59 | 1.2  | 3.30 | 1.4 | 4.37 | 0.8 | 3.35          | 3.15 | 2.51 | 2.72 | <b>2.93</b> | <b>0.38</b> | <b>13.1</b> |  |  |  |  |
| R1                         | Q11 | 0.59                  | 0.9  | 0.28 | 0.9  | 1.31 | 0.9 | 1.67 | 0.1 | 1.22          | 1.50 | 1.00 | 1.04 | <b>1.19</b> | <b>0.23</b> | <b>19.0</b> |  |  |  |  |
| R2                         | Q25 | 0.74                  | 4.9  | 0.29 | 4.9  | 1.45 | 1.0 | 1.82 | 0.8 | 1.53          | 1.54 | 1.10 | 1.13 | <b>1.33</b> | <b>0.24</b> | <b>18.2</b> |  |  |  |  |
|                            | Q4  | 0.33                  | 0.5  | 0.15 | 0.5  | 0.90 | 1.2 | 1.30 | 1.1 | 0.69          | 0.82 | 0.69 | 0.81 | <b>0.75</b> | <b>0.07</b> | <b>9.5</b>  |  |  |  |  |
| R3                         | Q26 | 0.47                  | 0.04 | 0.18 | 0.04 | 1.04 | 1.2 | 1.74 | 0.6 | 0.97          | 0.97 | 0.79 | 1.08 | <b>0.95</b> | <b>0.12</b> | <b>12.6</b> |  |  |  |  |
| R4                         | Q27 | 0.51                  | 1.5  | 0.17 | 1.5  | 0.92 | 3.2 | 1.22 | 0.4 | 1.05          | 0.92 | 0.70 | 0.76 | <b>0.86</b> | <b>0.16</b> | <b>18.4</b> |  |  |  |  |
|                            | Q14 | 0.46                  | 1.9  | 0.20 | 1.9  | 1.11 | 0.1 | 1.45 | 0.6 | 0.95          | 1.08 | 0.85 | 0.90 | <b>0.94</b> | <b>0.10</b> | <b>10.5</b> |  |  |  |  |
| TOTAL <sup>b</sup>         |     |                       |      |      |      |      |     | 7.85 |     |               |      |      |      |             | 10.68       |             |  |  |  |  |

  

| Clp ring with no salt incubations (200 kDa) |     |                       |     |      |     |      |     |      |     |               |      |      |     |      |      |      |      |      |      |             |             |             |
|---------------------------------------------|-----|-----------------------|-----|------|-----|------|-----|------|-----|---------------|------|------|-----|------|------|------|------|------|------|-------------|-------------|-------------|
| Clp                                         | Pep | Quantity (x 100 fmol) |     |      |     |      |     |      |     | Stoichiometry |      |      |     |      |      |      |      |      |      |             |             |             |
|                                             |     | R4-3                  | %CV | R4-4 | %CV | P3-3 | %CV | P3-4 | %CV | P3-5          | %CV  | P3-6 | %CV | R4-3 | R4-4 | P3-3 | P3-4 | P3-5 | P3-6 | AVE         | SD          | %CV         |
| P1                                          | Q6  | 4.56                  | 3.6 | 0.86 | 4.4 | 1.19 | 1.6 | 1.75 | 1.0 | 6.45          | 1.5  | 6.89 | 0.4 | 3.19 | 3.13 | 3.34 | 3.32 | 3.46 | 3.53 | <b>3.33</b> | <b>0.15</b> | <b>4.6</b>  |
| R1                                          | Q11 | 1.54                  | 0.8 | 0.38 | 0.2 | 0.56 | 0.9 | 0.67 | 0.4 | 2.17          | 0.4  | 2.28 | 0.5 | 1.08 | 1.40 | 1.57 | 1.28 | 1.16 | 1.17 | <b>1.28</b> | <b>0.18</b> | <b>14.3</b> |
| R2                                          | Q25 | 1.84                  | 2.4 | 0.49 | 3.6 | 0.67 | 0.6 | 0.81 | 1.9 | 2.30          | 1.9  | 3.04 | 1.1 | 1.29 | 1.80 | 1.89 | 1.54 | 1.24 | 1.55 | <b>1.55</b> | <b>0.26</b> | <b>16.9</b> |
|                                             | Q4  | 0.93                  | 1.2 | 0.24 | 3.3 | 0.27 | 0.7 | 0.47 | 0.9 | 1.74          | 15.5 | 1.79 | 0.3 | 0.65 | 0.89 | 0.75 | 0.90 | 0.93 | 0.92 | <b>0.84</b> | <b>0.11</b> | <b>13.4</b> |
| R3                                          | Q26 | 1.35                  | 0.8 | 0.29 | 1.0 | 0.38 | 1.1 | 0.51 | 1.0 | 1.77          | 7.0  | 2.47 | 0.9 | 0.94 | 1.07 | 1.06 | 0.97 | 0.95 | 1.26 | <b>1.04</b> | <b>0.12</b> | <b>11.6</b> |
| R4                                          | Q27 | 1.43                  | 0.5 | 0.23 | 2.5 | 0.37 | 1.3 | 0.48 | 3.1 | 1.69          | 2.5  | 1.82 | 0.7 | 1.00 | 0.84 | 1.03 | 0.91 | 0.91 | 0.93 | <b>0.94</b> | <b>0.07</b> | <b>7.3</b>  |
|                                             | Q14 | 1.43                  | 0.2 | 0.32 | 1.9 | 0.34 | 1.3 | 0.57 | 0.8 | 2.04          | 1.4  | 2.09 | 1.6 | 1.00 | 1.16 | 0.97 | 1.09 | 1.09 | 1.07 | <b>1.06</b> | <b>0.07</b> | <b>6.4</b>  |

  

| purified Clp ring from on-column salt incubation (200 kDa) |     |                       |      |     |      |     |      |      |      |               |             |             |  |  |  |  |  |  |  |  |
|------------------------------------------------------------|-----|-----------------------|------|-----|------|-----|------|------|------|---------------|-------------|-------------|--|--|--|--|--|--|--|--|
| Clp                                                        | Pep | Quantity (x 100 fmol) |      |     |      |     |      |      |      | Stoichiometry |             |             |  |  |  |  |  |  |  |  |
|                                                            |     | %CV                   | R4-6 | %CV | R4-7 | %CV | R4-6 | R4-7 | R4-8 | AVE           | SD          | %CV         |  |  |  |  |  |  |  |  |
| P1                                                         | Q6  | 1.5                   | 2.74 | 1.0 | 1.15 | 1.2 | 2.79 | 3.38 | 2.68 | <b>2.95</b>   | <b>0.38</b> | <b>12.7</b> |  |  |  |  |  |  |  |  |
| R1                                                         | Q11 | 0.4                   | 0.96 | 0.9 | 0.58 | 0.6 | 1.10 | 1.19 | 1.35 | <b>1.21</b>   | <b>0.12</b> | <b>10.1</b> |  |  |  |  |  |  |  |  |
| R2                                                         | Q25 | 6.8                   | 1.03 | 8.4 | 0.52 | 0.2 | 1.42 | 1.27 | 1.21 | <b>1.30</b>   | <b>0.11</b> | <b>8.1</b>  |  |  |  |  |  |  |  |  |
|                                                            | Q4  | 0.6                   | 0.68 | 0.3 | 0.39 | 0.4 | 0.67 | 0.84 | 0.91 | <b>0.81</b>   | <b>0.12</b> | <b>15.3</b> |  |  |  |  |  |  |  |  |
| R3                                                         | Q26 | 0.9                   | 0.81 | 0.6 | 0.58 | 1.2 | 0.62 | 1.00 | 1.34 | <b>0.99</b>   | <b>0.36</b> | <b>36.9</b> |  |  |  |  |  |  |  |  |
| R4                                                         | Q27 | 1.5                   | 0.73 | 1.1 | 0.38 | 1.7 | 0.92 | 0.90 | 0.89 | <b>0.90</b>   | <b>0.02</b> | <b>1.7</b>  |  |  |  |  |  |  |  |  |
|                                                            | Q14 | 0.8                   | 0.89 | 1.7 | 0.48 | 0.6 | 1.08 | 1.10 | 1.11 | <b>1.10</b>   | <b>0.02</b> | <b>1.4</b>  |  |  |  |  |  |  |  |  |

  

| Clp core complex (350 kDa) |     |                       |     |      |     |      |     |      |     |               |      |      |      |             |             |             |  |  |  |  |
|----------------------------|-----|-----------------------|-----|------|-----|------|-----|------|-----|---------------|------|------|------|-------------|-------------|-------------|--|--|--|--|
| Clp                        | Pep | Quantity (x 100 fmol) |     |      |     |      |     |      |     | Stoichiometry |      |      |      |             |             |             |  |  |  |  |
|                            |     | R4-1                  | %CV | R4-2 | %CV | P3-1 | %CV | P3-2 | %CV | R4-1          | R4-2 | P3-1 | P3-2 | AVE         | SD          | %CV         |  |  |  |  |
| P3                         | Q20 | 0.47                  | 1.8 | 0.26 | 0.5 | 1.60 | 2.8 | 1.84 | 0.4 | 0.98          | 1.38 | 1.22 | 1.15 | <b>1.18</b> | <b>0.16</b> | <b>13.8</b> |  |  |  |  |
| P4                         | Q8  |                       |     |      |     | 2.82 | 1.6 | 3.53 | 1.2 |               |      | 2.15 | 2.20 | <b>2.17</b> | <b>0.04</b> | <b>1.6</b>  |  |  |  |  |
| P5                         | Q22 | 1.60                  | 1.0 | 0.48 | 1.5 | 2.51 | 1.3 | 3.74 | 3.4 | 3.31          | 2.56 | 1.91 | 2.33 | <b>2.53</b> | <b>0.59</b> | <b>23.2</b> |  |  |  |  |
|                            | Q9  | 1.08                  | 0.9 | 0.50 | 0.4 | 4.86 | 0.9 | 6.25 | 0.7 | 2.24          | 2.68 | 3.70 | 3.90 | <b>3.13</b> | <b>0.80</b> | <b>25.5</b> |  |  |  |  |
| P6                         | Q23 | 0.72                  | 1.8 | 0.32 | 1.1 | 1.50 | 1.2 | 1.86 | 0.8 | 1.48          | 1.68 | 1.14 | 1.16 | <b>1.37</b> | <b>0.26</b> | <b>19.3</b> |  |  |  |  |
|                            | Q10 | 0.69                  | 0.4 | 0.24 | 2.6 | 1.13 | 1.9 | 1.35 | 0.3 | 1.42          | 1.27 | 0.86 | 0.84 | <b>1.10</b> | <b>0.29</b> | <b>26.7</b> |  |  |  |  |
| TOTAL <sup>b</sup>         |     |                       |     |      |     |      |     | 9.43 |     |               |      |      |      |             | 11.97       |             |  |  |  |  |

  

| Clp ring with no salt incubations (200 kDa) |     |                       |      |      |     |      |     |      |      |               |     |      |      |      |      |      |             |             |             |             |             |            |
|---------------------------------------------|-----|-----------------------|------|------|-----|------|-----|------|------|---------------|-----|------|------|------|------|------|-------------|-------------|-------------|-------------|-------------|------------|
| Clp                                         | Pep | Quantity (x 100 fmol) |      |      |     |      |     |      |      | Stoichiometry |     |      |      |      |      |      |             |             |             |             |             |            |
|                                             |     | R4-3                  | %CV  | P3-3 | %CV | P3-4 | %CV | P3-5 | %CV  | P3-6          | %CV | R4-3 | P3-3 | P3-4 | P3-5 | P3-6 | AVE         | SD          | %CV         |             |             |            |
| P3                                          | Q20 | 0.24                  | 13.5 | 1.70 | 0.4 | 2.19 | 0.3 | 2.22 | 14.5 | 3.56          | 0.9 | 0.73 | 1.16 | 1.13 | 0.86 | 1.02 | <b>0.98</b> | <b>0.18</b> | <b>18.6</b> |             |             |            |
| P4                                          | Q8  |                       |      |      |     | 3.75 | 1.9 | 5.24 | 0.7  | 5.68          | 6.0 | 9.25 | 0.9  |      |      | 2.57 | 2.71        | 2.20        | 2.66        | <b>2.53</b> | <b>0.23</b> | <b>9.1</b> |
| P5                                          | Q22 | 0.86                  | 0.42 | 2.47 | 1.7 | 5.59 | 0.6 | 6.63 | 2.0  | 9.82          | 1.2 | 2.60 | 1.69 | 2.89 | 2.57 | 2.83 | <b>2.52</b> | <b>0.48</b> | <b>19.2</b> |             |             |            |
|                                             | Q9  | 0.68                  | 1.71 | 4.33 | 1.2 | 7.54 | 0.9 | 7.56 | 0.5  | 12.91         | 0.7 | 2.04 | 2.96 | 3.90 | 2.93 | 3.72 | <b>3.11</b> | <b>0.74</b> | <b>23.9</b> |             |             |            |
| P6                                          | Q23 | 0.35                  | 0.87 | 1.69 | 0.3 | 2.27 | 0.7 | 3.01 | 1.3  | 3.78          | 1.2 | 1.05 | 1.16 | 1.17 | 1.16 | 1.09 | <b>1.13</b> | <b>0.05</b> | <b>4.8</b>  |             |             |            |
|                                             | Q10 | 0.31                  | 2.33 | 1.23 | 0.2 | 1.60 | 1.4 | 2.16 | 0.5  | 3.16          | 2.0 | 0.95 | 0.84 | 0.83 | 0.84 | 0.91 | <b>0.87</b> | <b>0.05</b> | <b>6.2</b>  |             |             |            |
| TOTAL <sup>b</sup>                          |     |                       |      |      |     |      |     |      |      |               |     |      |      |      |      |      |             |             |             |             |             |            |



T1 Q28 0.85 0.72 1.31 0.74 0.72 2.35 1.31 0.23 0.58 0.68 0.28 0.38 0.48 0.18 38.1

| purified Clp ring from on-column salt incubation (200 kDa) |     |                       |     |      |     |      |     |       |     |               |      |      |       |             |             |             |
|------------------------------------------------------------|-----|-----------------------|-----|------|-----|------|-----|-------|-----|---------------|------|------|-------|-------------|-------------|-------------|
| Clp                                                        | Pep | Quantity (x 100 fmol) |     |      |     |      |     |       |     | Stoichiometry |      |      |       |             |             |             |
|                                                            |     | P3-7                  | %CV | P3-8 | %CV | P3-9 | %CV | P3-10 | %CV | P3-7          | P3-8 | P3-9 | P3-10 | AVE         | SD          | %CV         |
| P3                                                         | Q20 | 0.57                  | 1.8 | 1.52 | c   | 0.59 | 1.2 | 2.14  | 1.5 | 0.99          | 0.95 | 0.86 | 1.15  | <b>0.99</b> | <b>0.12</b> | <b>12.3</b> |
| P4                                                         | Q8  | 1.37                  | 1.2 | 3.23 | 3.4 | 1.48 | 1.6 | 4.92  | 2.1 | 2.40          | 2.02 | 2.14 | 2.64  | <b>2.30</b> | <b>0.28</b> | <b>12.0</b> |
| P5                                                         | Q22 | 0.85                  | 0.5 | 3.62 | 4.4 | 1.55 | 1.5 | 4.76  | 0.2 | 1.49          | 2.26 | 2.24 | 2.55  | <b>2.14</b> | <b>0.45</b> | <b>21.3</b> |
|                                                            | Q9  | 1.45                  | 1.1 | 5.00 | 1.2 | 2.11 | 0.5 | 7.73  | 0.8 | 2.54          | 3.12 | 3.05 | 4.15  | <b>3.21</b> | <b>0.67</b> | <b>21.0</b> |
| P6                                                         | Q23 | 0.65                  | 1.3 | 1.78 | 1.6 | 0.76 | 1.3 | 2.08  | 0.4 | 1.14          | 1.11 | 1.10 | 1.12  | <b>1.12</b> | <b>0.02</b> | <b>1.8</b>  |
|                                                            | Q10 | 0.49                  | 1.7 | 1.43 | 1.8 | 0.63 | 0.3 | 1.65  | 1.8 | 0.86          | 0.89 | 0.90 | 0.88  | <b>0.88</b> | <b>0.02</b> | <b>2.2</b>  |

<sup>a</sup> Based on affinity purification and native gel separation of various Clp assemblies from R4-StrepII (n=8) or P3-StrepII (n=10) transgenic lines. Molar amounts are derived from peak area ratios between the endogenous Clp peptides and 100 fmol spiked Clp-QconCAT peptides. ClpP4 could not be quantified in runs R4-1, R4-2 and R4-5. Stoichiometry was calculated by normalization against the molar amounts of ClpR4 or ClpP6 proteins. Peak areas for peptides identified with multiple charge states (R4-1, Q27 and P5-1, Q22) or modifications (P3-2, Q20 and P5-1, Q22) were combined prior to calculating the light-to-heavy ratios.

<sup>b</sup> Sum of the molar amounts of the constituent Clp subunits per ring. The molar amounts for proteins quantified with two peptides were averaged. The average ratio between the total moles of ClpP1/R and ClpP3-6 within the Clp core is 1.16 for n=2 (Runs P3-1 and P3-2).

**Supplemental Table 5.** Accession numbers for protein and cDNA sequences of the Clp proteins from prokaryotes, green algae and plants.

| Protein Accessions (Prokaryotic Clps)                 |                                                       |                                           |                                           |                                                     |                                           |
|-------------------------------------------------------|-------------------------------------------------------|-------------------------------------------|-------------------------------------------|-----------------------------------------------------|-------------------------------------------|
|                                                       | Proteo-bacteria P                                     | Cyano P1                                  | Cyano P2                                  | Cyano P3                                            | Cyano R                                   |
| <i>E. coli</i> (Ec)                                   | POA6G7                                                |                                           |                                           |                                                     |                                           |
| <i>Rickettsia prowazekii</i> (Rp)                     | RP520                                                 |                                           |                                           |                                                     |                                           |
| <i>Wolbachia wmel</i> (Ww)                            | WD0319                                                |                                           |                                           |                                                     |                                           |
| <i>Anabaena</i> sp. (strain PCC 7120) (As)            |                                                       | Q8YXH5                                    | Q8YQX8                                    | Q8YP43                                              | Q8YP42                                    |
| <i>Synechocystis</i> sp. (strain PCC 6803) (Ss)       |                                                       | P54416                                    | Q59993                                    | P74467                                              | P74466                                    |
| <i>Synechococcus elongatus</i> (strain PCC 7942) (Se) |                                                       | P54415                                    | O34125                                    | Q9L4P3                                              | Q9L4P4                                    |
| <i>Microcystis aeruginosa</i> (Ma)                    |                                                       | MAE_11870                                 | MAE_62720                                 | MAE_57180                                           | MAE_57190                                 |
| <i>Prochlorococcus marinus</i> MED4 (Pm)              |                                                       | PMM0742                                   | PMM1656                                   | PMM1314                                             | PMM1313                                   |
| cDNA Accessions (prokaryotic Clps)                    |                                                       |                                           |                                           |                                                     |                                           |
|                                                       | Proteo-bacteria P                                     | Cyano P1                                  | Cyano P2                                  | Cyano P3                                            | Cyano R                                   |
| <i>E. coli</i> (Ec)                                   | ENA AAA23588                                          |                                           |                                           |                                                     |                                           |
| <i>Rickettsia prowazekii</i> (Rp)                     | RP520                                                 |                                           |                                           |                                                     |                                           |
| <i>Wolbachia wmel</i> (Ww)                            | WD0319                                                |                                           |                                           |                                                     |                                           |
| <i>Anabaena</i> sp. (strain PCC 7120) (As)            |                                                       | gij17227497:<br>1470240-1470854           | gij17227497:<br>4443275-4443973           | gij17227497: 5219511-5220104                        | gij17227497: 5220184-5220846              |
| <i>Synechocystis</i> sp. (strain PCC 6803) (Ss)       |                                                       | gij16329170:<br>3212598-3213194           | gij16329170:<br>3245421-3246101           | gij16329170: 2206551-2207159                        | gij16329170: 2205774-2206451              |
| <i>Synechococcus elongatus</i> (strain PCC 7942) (Se) |                                                       | ENA AAC67306                              | ENA AAB68677                              | ENA AAB68677                                        | ENA CAB81780                              |
| <i>Microcystis aeruginosa</i> (Ma)                    |                                                       | MAE_11870                                 | MAE_62720                                 | MAE_57180                                           | MAE_57190                                 |
| <i>Prochlorococcus marinus</i> MED4 (Pm)              |                                                       | PMM0742                                   | PMM1656                                   | PMM1314                                             | PMM1313                                   |
| Protein Accessions (Plastid Clps)                     |                                                       |                                           |                                           |                                                     |                                           |
|                                                       | P1                                                    | P3                                        | P4                                        | P5                                                  | P6/R6                                     |
| <i>Chlamydomonas reinhardtii</i> (Cr)                 | P42380                                                |                                           | A8IJ60                                    | A8IL21                                              | A8INX1                                    |
| <i>Physcomitrella patens</i> (PhyP)                   | Q6YXM7                                                | P3-1: A9RYV9, P3-2:<br>A9T6I1             | P4-1: A9TZR6, P4-2:<br>A9RE44             | P5-1: A9S5E8, P5-2: A9TE25                          | P6-1: A9TH43, P6-2: A9SWP4                |
| <i>Selaginella moellendorffii</i> (Sm)                | C7B2H1                                                | XP_002960346.1                            | XP_002981945.1                            | XP_002963649.1, XP_002983780.1                      | XP_002968942.1                            |
| <i>Arabidopsis thaliana</i> (At)                      | ATCG00670.1                                           | AT1G66670.1                               | AT5G45390.1                               | AT1G02560.1                                         | AT1G11750.1                               |
| <i>Populus trichocarpa</i> (Pt)                       | A4GYT6                                                | B9H362                                    | P4-1: B9GZW8, P4-2:<br>A9PA38             | P5-1: B9GST6, P5-2: B9I9I1                          | P6-1: A9PDP3, P6-2: B9HRQ3                |
| <i>Zea mays</i> (Zm) ("GRM" removed from Accessions)  | ZM2G448161_P01,<br>ZM2G427444_P06                     | ZM2G001755_P01                            |                                           | ZM2G121456_P01                                      | ZM2G092632_P01                            |
| <i>Oryza sativa</i> (Os)                              | Os08g15270, Os10g21300,<br>Osp1g005990,<br>Os12g10590 | os01g32350.1                              | Os10g43050.1                              | Os03g19510.1                                        | Os03g29810.1                              |
| <i>Psilotum nodum</i> (Pn)                            | Q8WHZ7                                                |                                           |                                           |                                                     |                                           |
| <i>Adiantum capillus renesis</i> (Ac)                 | Q85FJ8                                                |                                           |                                           |                                                     |                                           |
| <i>Pinus thunbergii</i> (Pnt)                         | P41609                                                |                                           |                                           |                                                     |                                           |
| cDNA accessions (for plastid ClpPs)                   |                                                       |                                           |                                           |                                                     |                                           |
|                                                       | P1                                                    | P3                                        | P4                                        | P5                                                  | P6/R6                                     |
| <i>Chlamydomonas reinhardtii</i> (Cr)                 | ENA ACJ50097                                          |                                           | gij159465134: 119-1156                    | gij159465360: 108-878                               | gij159466487: 159-1010                    |
| <i>Physcomitrella patens</i> (PhyP)                   | gij34501376:11632-11702,<br>12338-12632, 13074-13307  | P3-1: gij168013185,<br>P3-2: gij168043510 | P4-1: gij168064315,<br>P4-2: gij167999543 | P5-1: gij168018158: 395-1306,<br>gij168048811 P5-2: | P6-1: gij168050942, P6-2:<br>gij168036512 |
| <i>Selaginella moellendorffii</i> (Sm)                | gij255961289: c>68286-68216,<br>c67451-66902          | XM_002960300.1                            | XM_002981899.1                            | XM_002963603.1 XM_002983734.1                       | XM_002968896.1                            |

|                                                                  |                                                                                             |                                        |                                                  |                                                                  |                                                                                              |
|------------------------------------------------------------------|---------------------------------------------------------------------------------------------|----------------------------------------|--------------------------------------------------|------------------------------------------------------------------|----------------------------------------------------------------------------------------------|
| <i>Arabidopsis thaliana</i> (At)                                 | ATCG00670.1                                                                                 | gij145337232: 57-986                   | gij145358888                                     | gij145334998                                                     | gij145335409                                                                                 |
| <i>Populus trichocarpa</i> (Pt)                                  | ENA ABO36731                                                                                | gij224079412                           | P4-1:<br>gij224074499:77-739<br>, P4-2: EF145046 | P5-1: gij224068557: 123-1025 ,<br>2: gij224128301: 37-543        | P5-<br>P6-1: gij224080314: 72-869 ,<br>P6-2: gij224103436:1-741                              |
| <i>Zea mays</i> (Zm) ("GRMZM" removed from Accessions)           | P1-1: 2G448161_T01 , P1-2: 2G427444_T06                                                     | 2G001755_P01                           | 2G001755_T01                                     | 2G121456_T03                                                     | 2G121456_T03                                                                                 |
| <i>Oryza sativa</i> (Os)                                         | P1-1: 13108.m09245, P1-2: 13110.m07757, P1-3: gij11466763: 67638-68288 , P1-4: 13112.m01122 | 13101.m03260                           | 13110.m04073                                     | 13103.m02334                                                     | 13103.m03417                                                                                 |
| <i>Psilotum nodum</i> (Pn)                                       | ENA BAB84241                                                                                |                                        |                                                  |                                                                  |                                                                                              |
| <i>Adiantum capillus renensis</i> (Ac)                           | ENA AAP29415                                                                                |                                        |                                                  |                                                                  |                                                                                              |
| <i>Pinus thurnbergii</i> (Pnt)                                   | gij7524593: 29611-30201                                                                     |                                        |                                                  |                                                                  |                                                                                              |
| <b>Protein accessions (plastid ClpR and mitochondrial ClpP2)</b> |                                                                                             |                                        |                                                  |                                                                  |                                                                                              |
|                                                                  | <b>R1</b>                                                                                   | <b>R2</b>                              | <b>R3</b>                                        | <b>R4</b>                                                        | <b>mito P2</b>                                                                               |
| <i>Chlamydomonas reinhardtii</i> (Cr)                            | A8INX1                                                                                      | jgi Chlre4 183767                      | A8I547                                           | A8IH07                                                           | A8IX06                                                                                       |
| <i>Physcomitrella patens</i> (PhyP)                              | P6-1: A9TH43, P6-2: A9SWP4                                                                  | R1-1:A9TVY1, R1-2: A9SI89              | R2-1: A9SWI4, R2-2: A9T3W3                       | R3-1: A9SG20, R3-2: A9RZ41                                       | R4-1: A9RQL9, R4-2: A9TF07, R4-3: A9SSY7                                                     |
| <i>Selaginella moellendorffii</i> (Sm)                           | XP_002968942.1                                                                              | XP_002970082.1                         | XP_002968834.1                                   | XP_002990376.1                                                   | XP_002982594.1                                                                               |
| <i>Arabidopsis thaliana</i> (At)                                 | AT1G11750.1                                                                                 | AT1G49970.1                            | AT1G12410.1                                      | AT1G09130.1                                                      | AT4G17040.1                                                                                  |
| <i>Populus trichocarpa</i> (Pt)                                  | P6-1: A9PDP3, P6-2: B9HRQ3                                                                  | R1-1: B9HMY7, R1-2: B9NHA6             | B9N3L0                                           | A9PFT0                                                           | A9PAS6                                                                                       |
| <i>Zea mays</i> (Zm)                                             | ZM2G092632_P01                                                                              | ZM2G099529_P01                         | ZM2G148106_P01                                   | ZM2G030072_P02                                                   | AC207652.3_FGP003                                                                            |
| <i>Oryza sativa</i> (Os)                                         | Os03g29810.1                                                                                | Os05g51450.1                           | Os06g04530.1                                     | Os03g22430.1                                                     | Os01g16530.1                                                                                 |
|                                                                  |                                                                                             |                                        |                                                  |                                                                  |                                                                                              |
| <b>cDNA accessions (Plastid ClpR and mitochondrial ClpP2)</b>    |                                                                                             |                                        |                                                  |                                                                  |                                                                                              |
|                                                                  | <b>R1</b>                                                                                   | <b>R2</b>                              | <b>R3</b>                                        | <b>R4</b>                                                        | <b>mito P2</b>                                                                               |
| <i>Chlamydomonas reinhardtii</i> (Cr)                            | jgi Chlre4 183767 estExt_fgenesht2_kg_C_10275                                               | gij159467460: 144-992                  | gij159464778: 1-1248                             | gij159470090: 140-970                                            | gij159477908                                                                                 |
| <i>Physcomitrella patens</i> (PhyP)                              | R1-1: gij168061570, R1-2: gij168026988                                                      | R2-1: gij168036369, R2-2: gij168041626 | R3-1: gij168025571, R3-2: gij168013354           | R4-1: gij168007319, R4-2: gij168049468, R4-3: gij168033938:1-714 | gij168031791                                                                                 |
| <i>Selaginella moellendorffii</i> (Sm)                           | XM_002970036.1                                                                              | XM_002968788.1                         | XM_002990330.1                                   | XM_002982548.1                                                   | XM_002983734.1                                                                               |
| <i>Arabidopsis thaliana</i> (At)                                 | gij145336568                                                                                | gij145335431                           | gij145335309                                     | gij30683910                                                      | gij186524962: 74-799                                                                         |
| <i>Populus trichocarpa</i> (Pt)                                  | R1-1:gij224103734:80-1255, R1-2: gij224097119                                               | gij224125071: 126-965                  | gij224125177: 74-1099                            | gij224126446: 25-957                                             | P2-1: gij224081362: 28-762 ,<br>P2-2: gij224094112: 142-876 ,<br>P2-3: gij224094112: 142-876 |
| <i>Zea mays</i> (Zm) ("GRMZM" removed from Accessions)           | 2G099529_T01                                                                                | 2G148106_T01                           | 2G030072_T02                                     | AC207652.3_FGT003                                                | P2m-1: 2G320135_T02,<br>P2m-2: 2G474883_T01,<br>P2p-1: 2G053236_T01,<br>P2p-2: 2G111756_T01  |
| <i>Oryza sativa</i> (Os)                                         | 13105.m05548                                                                                | 13106.m00412                           | 13103.m02699                                     | 13101.m01848                                                     | P2-1: 13104.m04426,<br>P2-2: 13102.m04675                                                    |

**Supplemental Table 6. Primers used in this study**

| <b>Construct</b>                            | <b>Primers (5' to 3')</b>                                                                       |
|---------------------------------------------|-------------------------------------------------------------------------------------------------|
| R4cDNASTrepII Step1, for PCR amplification  | 1: CCATGGAGGTAGCAGCAGCGA<br>2: AGGATGAGACCAAATGAGTTGTGCC                                        |
| R4cDNASTrepII Step2, for PCR amplification  | 1: CACCATGGAGGTAGCAGCAGCGAC<br>2: TCACTTCTCGAATTGAGGATGAGACCA                                   |
| R4StrepII in pEARLEYGATE100, for genotyping | 1: GGGAATGTCTCTCGTACCTTCAGTT<br>2: GGCGCTCTATCATAGATGTCGCTATAAACC                               |
| R4StrepII in pEARLEYGATE100, for genotyping | 1: CCATGGAGGTAGCAGCAGCGA<br>2: GGCGCTCTATCATAGATGTCGCTATAAACC                                   |
| R4 gene specific, for genotyping            | 1; GGGAATGTCTCTCGTACCTTCAGTT<br>2: ACAACTGGACACTGTTGCATAATGA                                    |
| P3 cDNA Strep II, for PCR amplification     | 1: ATGGAGATGAGTTTGCGTCTCGCTTC<br>2:CTACTTCTCGAATTGAGGATGAGACCATTCAA<br>T GGCGGCATAACCATTCTGTGTC |
| P3StrepII in pEARLEYGATE100, for genotyping | 1: ATGGAGATGAGTTTGCGTCTCGCTTC<br>2: GGCGCTCTATCATAGATGTCGCTATAAACC                              |
| TDNA insertion, for genotyping              | 1: GGCAATCAGCTGTTGCCCGTCTCACTGGTG<br>2: ACAACTGGACACTGTTGCATAATGA                               |
| ClpQconCAT in pET21, for confirmation       | 1: TTATGCTAGTTATTGCTCAGCGGTG<br>2: CCATTTCTCGTATCGCATTTCAC                                      |
| ClpQconCAT in pET21, for confirmation       | 1: TCCGGCGTAGAGGATCGAGATC<br>2: TGAAATGCGATACGAGAAATGG                                          |

**Supplementary Text. Selection of the Clp-QconCAT peptides.** Sequence coverage of the subunits of the plastid-localized Clp protease complex from extensive MS analysis of *Arabidopsis* chloroplasts, total leaf extracts and purified Clp complexes. The identified tryptic peptides are shown in red and are separated by bars. The predicted chloroplast transit peptide sequence is underlined. Chemically reactive residues (methionine and cysteine) and positions in the sequence that confer instability (e.g., N-terminal Asn, N-terminal Gln, Asn-Gly) or missed cleavages (e.g., Pro after Lys or Arg) within the identified peptides are shown in green. The selected Clp-QconCAT peptides are highlighted in yellow. Additional comments regarding the behavior of the selected Clp peptides during the Clp-QconCAT quantification experiments are also included.

### ClpP1

MPIGVPKVPFR|**SPGEGDTSWVDIYNR**|LYRER|**LFFLGQEV**DTEISNQLISL|**M**IYLSIEK|DTKD  
 LYLFINSPPGGWVISGMAIYDTMQFVR|**PDVQTI****M**|**GLAASIASFILVGGAITK**|R|**IAPPHAR**|V  
**M**IHQPASSFYEAQTGFEILEAEELLK|LR|**ETITR**|VYVQR|**TGK****F**IWVISED|**M**ER|DVFMSATE  
 AQAHGIVDLVAVQ

For ClpP1, only one peptide (SPGEGDTSWVDIYNR, P1-2) passed the requirements for a good quantifiable peptide. It harbors tryptophan which can be oxidized. However, peak area analyses of the unmodified peptide and its various oxidized forms (e.g., kynurenine, hydroxytryptophan and dihydroxytryptophan (see also (Perdivara et al., 2010)) showed that 98% of this peptide remained unoxidized in our Clp-QconCAT experiments. IAPPHAR (P1-1) was rarely detected in our extensive MS analysis of various *Arabidopsis* large-scale proteome experiments but we still included it in our Clp-QconCAT construct hoping that we would observe it in purified Clp complexes. However, we still did not detect this peptide in our Clp purifications most likely due to its short peptide length and high hydrophilicity. Most of the other peptides are long, methionine-bearing peptides that could be differentially modified and could be very hydrophobic.

### ClpR2

MAVSFNTTLHQPSLSPSCSIKLYSGLKPOSASFLASGYQNLNKEFYGRVYKSLQSGTGKASR  
 SRVKMMPIGTPRVPYR|NR|**EEGTWQWVDIWNALYR**|ER|**VIFIGQNIDEEFSNQILAT**|**M**LYL  
 DTLDDSR|R|**IY****M**YLNPGGDLTPSLAIYDT|**M**K|SLK|**SPVGTH****C**VGLAYNLAGFLLAAGEK|G  
 HR|**F**A**M**PLSR|**I**ALQSPAGAAR|GQADDIQNEAK|ELSR|IR|**DYLFNELAK**|NTGQPAER|**VFK**|D  
 LSR|VK|R|**FNAEEAIEYGLIDK**|IVRPPR|IKEDAPRQDESAGLG

We were able to quantify the two ClpR2 peptide standards which exhibited good instrument responses. However, peptide IALQSPAGAAR (R2-1) yielded a slightly higher stoichiometry value than the other peptide standard (see Table 2) and this might have been due to a potential missed cleavage within the Clp-QconCAT construct (see Methods section for the Clp-QconCAT sequence) yielding slightly lower amounts of the labeled standard and higher sample-to-standard ratios.

### ClpR1

**MATALVSPLTSQLNHEAVCSKFVLPKSPFMSGSKLFSSNMPCSTVPRRTRRSRSHCFASAKDM**  
**SFDHIPKQFRGDNLDGVMQNFKNVPQYFYGLNSAQMDMFMTEDESPVRRQAEKVTEESIS**  
**SRNNYLNGGIWSMSGMNAADARRYSMSVQMYRGGGGGGSERPR|TAPPDLPSLLLDAR|**  
**ICYLGMPIVPAVTELLVAQFMWLDYDNPTKPIYLYINSPGTQNEK|METVGSETEAYAIADTI**  
**SYK|SDVYTINCGMAFGQAAILLSLGK|KGYRAVQPHSSTKLYLPKVNR|SSGAAIMWIK|**  
**AK|ELDANTEYYIELLAK|GTGK|SK|EQINEDIK|R|PK|YLQAQAAIDYGIADK|IADSQDSSEK|**  
**R|DYDGTLAQR|AIRPGGGSPAAPAGLR|**

The two peptides were both observed in our large-scale experiments. However, the peptide YLQAQAAIDYGIADK (R1-1) exhibited low signal-to-noise ratio even for the stable isotope-labeled version (see Figure 2) and is thereby not amenable for quantification. The rest of the tryptic peptides were not selected since they exhibited weak MS intensity response (e.g., peptides EQINEDIK and IADSQDSSEK) and were occasionally detected, was part of a missed cleavage (peptide DYDGTLAQR) or possessed methionine/cysteine residues.

### ClpR3

**MASCLQASMNSLLPRSSSFSPHPPLSSNSSGRRNLKTFRYAFRAKASAKIPMPPINPK|DPFLS**  
**TLASIAANSPEK|LLNRPVNADVPPYLDIFDSPQLMSSPAQVER|SVAYNEHRPR|TPPPDLPSM**  
**LLDGR|IVYIGMPLVPAVTELVVAELMYLQWLDPK|EPIYIYINSTGTTR|DDGETVGMESEG**  
**FAIYDSLMLQLK|NEVHTVGVGAAIGQACLLLSAGTK|GKRFMMPHAK|AMIIQQPRVSSGLMP**  
**ASDVLIR|AK|EVITNR|DILVELLSK|HTGNSVETVANVMR|R|PYYMDAPKAK|EFGVIDR|ILW**  
**RGQEK|IADVVPSEEFDK|NAGIKSVV**

Similar to ClpR1, the two selected peptides for ClpR3 were both observed in our large-scale experiments. However, the peptide EPIYIYINSTGTTR (R3-1) exhibited low signal-to-noise ratio even for the stable isotope-labeled version (see Figure 2) and is thereby not amenable for quantification. The

other tryptic peptides also exhibited weak MS intensity response (peptide EFGVIDR), was part of a missed cleavage (peptide EVITNR) or have reactive residues and are thus not good for quantification. Peptide IADVVPSEEDK could have been chosen but this was occasionally detected from our initial experiments and was thus not selected included then.

#### ClpR4

MEVAAATATSFTTLRARTSAIIPSSSTRNLRSKPRFSSSSSLRASLSNGFLSPYTGGSISS  
DLCGAKLRAESLNPLNFSSSKPKRGVVMTMVIPFSK|GSAHEQPPDLASYLFK|NRIVYLG  
 SLVPSVTELLAEFLYLQYEDEEKPIYLYINSTGTTKNGEKLGYDTEAFAYDVMGYVKP  
 PFTLTCVGNAWGEAALLLTAGAKGNR|SALPSSTIMIK|QPIAR|FQGQATDVEIAR|K|EIKHI  
 KTEMVKLYSKHIGK|SPEQIEADIK|RPK|YFSPTEAVEYGIIDK|VVYNER|GSQDR|GVVSDL  
 K|K|AQLI

Both ClpR4 peptides were reliably quantified.

#### ClpP3

MEMSLRLASSSTSNPICLLNPGKNLNFPIRNHRIPKTSKPFVCRSSMSLSKPPR|OTLSSNWDV  
 SSFSIDSYAQSPSR|LPSFEELDTTNMLLR|QR|IVFLGSQVDDM|TADLVISQLLLDAEDSER|D  
 ITLFINSPGGSITAGMGIYDAMK|QCK|ADVSTV|LGLAAS|GAFLLASGSK|GKRYCMPNSK|  
 V|MIHQPLGTAGGK|ATEMSIRIREMMYHKIKLKNKIFSR|ITG|KPESEIESDTR|DNFLNPWEA  
 K|EYGLIDAVIDDG|K|GLIPIGDGTPPPK|TK|VWDLWK|VEGTTK|DNTNLPSEK|SMTQNG  
 YAAIE

For ClpP3, most identified peptides had methionine or had potential internal missed cleavage sites (KP in their sequences). We resorted to selecting a methionine-bearing peptide (LPFEELDTTNMLLR, P3-2) that exhibited good MS instrument response. We also included DNTNLPSEK (P3-1) which was rarely observed. We did not observe peptide DNFLNPWEAK in our initial experiments and was thereby not selected but we had been detecting it in enriched Clp complex purifications.

#### ClpP4

MGTLSLSSSLKPSLVSSRLNSSSSASSSSFPKPNLYLKPTKLISPLRTTSPSPLR|FAN  
 ASIE|ISQTQESAIR|GAESDV|GLLLR|ER|IVFLGSSIDDFVADAI|MSQLLLLDK|DPK|KDI  
 K|LFINSPGGSLSAT|MAIYDVVQLVR|ADVSTIALGIAASTASIILGAGTK|GK|R|FAM|PNTRI  
 |MIHQPLGGASGQAIDVEIQAKEV|MHNK|NNVTSIAG|CTSR|SFEQVLK|DIDR|DR|Y|MSPIEA

**VEYGLIDGVIDGDSIIPLEPVPDR|VKPR|VNYEEISK|DPMK|FLTPEIPDDEIY**

Most detected peptides in ClpP4 have methionine and peptide VNYEEISK was only detected as part of missed cleavages. Only SFEVLK (P4-1) worked. We included ADVSTIALGIAASTASILGAGTK (P4-2) but it was a very hydrophobic sticky peptide that does not completely elute during an LCMS run (we still detected in subsequent blank runs).

### ClpP5

**MAHACVSTSASSLRFTAGFVSASPNGSSFDSPKLSLPFEPLRSRKTNKLVS DRKNWKNSTPK  
AVYSGNLWTPEIPSPQGVWSIRDDLQVPSSPYFPAYAQQGGPPPMVQER|FQSII SQLFQYR|I  
IR|CGGAVDDD|MANIIVAQLLYLDAVDPTK|DIV|MYVNSPGGSVTAG|MAIFDT|MR|HIR|PDVS  
TV|VGLAAS|GAFLLSAGTK|GK|R|YSLPNSR|MIHQPLGGAQGGQTDIDIQANEM|LHHK|A  
NLNGYLAYHTGQSLEK|INQDTDR|DFM|SAKEAKEYGLIDGVI|NPLK|ALQPLAAA**

Peptide YSLPNSR was only detected in one experiment and peptide INQDTDR was only observed as part of a missed cleavage. The selected peptide FQSII SQLFQYR (P5-2) elutes later in the LC gradient although this does not fully explain why it exhibits a higher stoichiometry ratio than peptide P5-1 (ANLNGYLAYHTGQSLEK). Deamidation of Asn, most common in -Asn-Gly-sequences, yields aspartic acid (Asp) and isoaspartic acid ( $\beta$ Asp) and is usually observed in proteomic workflows involving overnight tryptic digestion (Krokhin et al., 2006). Two peaks were observed for the deamidated species (aspartic acid and isoaspartic acid are isomeric) of P5-1 and one species eluted closely with the unmodified P5-1. Previous studies revealed that reversed-phase LC using formic acid as ion-pairing modifier separated native and deamidated peptides in the order: -Asn- / $\beta$ Asp-/-Asp- (Krokhin et al., 2006).

### ClpP6

**MAGLAISPPLGLSFSSRTRNPKPTSFLSHNQRNPIRRIVSALQSPYGDSLK|AGLSSNVSGSPIK|  
IDNKAPRFGVIEAK|K|GNPPV|MPVMTPGGPLDLSSVLFNR|NR|IIFIGQPINAQVAQR|VISQL  
VTLASIDDK|SDILMYLNCPPGGSTYSVLAIYDCMSWIKPK|VGTVAFGVAASQGALLAGGE  
K|G|MR|YAMPNTR|V|MIHQPQTGC|GGHVEDVR|R|QVNEAIEAR|QKIDR|M|YAAFTGQPLEK|  
VQQYTERDRFLSASEALEFGLIDGLLETEY**

The two ClpP6 peptides worked well.
